1  
2  
3  
4  
5  
6  
7  
8  
9  
10  
11  
12  
13  
14  
15  
16  
17  
18  
19  
20  
21  
22  
23  
24  
25  
26  
27  
28

**An immature subset of neuroblastoma cells synthesizes retinoic acid and depends on this metabolite**

Tim van Groningen<sup>1,6</sup>, Camilla U. Niklasson<sup>2,6</sup>, Alvin Chan<sup>1</sup>, Nurdan Akogul<sup>1</sup>, Ellen M. Westerhout<sup>1</sup>, Kristoffer von Stedingk<sup>1,3</sup>, Mohamed Hamdi<sup>1</sup>, Linda J. Valentijn<sup>1</sup>, Sofie Mohlin<sup>3</sup>, Peter Stroeken<sup>1</sup>, Nancy E. Hasselt<sup>1</sup>, Franciska Haneveld<sup>1</sup>, Arjan Lakeman<sup>1</sup>, Danny A. Zwijnenburg<sup>1</sup>, Peter van Sluis<sup>1</sup>, Daniel Bexell<sup>2</sup>, Igor Adameyko<sup>4</sup>, Selina Jansky<sup>5</sup>, Frank Westermann<sup>5</sup>, Caroline Wigerup<sup>2</sup>, Sven Pålman<sup>2</sup>, Jan Koster<sup>1</sup>, Rogier Versteeg<sup>1,\*</sup>, Johan van Nes<sup>1,\*</sup>

<sup>1</sup>Department of Oncogenomics, Amsterdam UMC, University of Amsterdam, Meibergdreef 9, 1105 AZ, Amsterdam, The Netherlands

<sup>2</sup>Division of Translational Cancer Research, Department of Laboratory Medicine, Lund University, Lund, Sweden.

<sup>3</sup>Division of Pediatrics, Department of Clinical Sciences, Lund University, Lund, Sweden.

<sup>4</sup>Department of Physiology and Pharmacology, Karolinska Institutet, 17177 Stockholm, Sweden.

<sup>5</sup>Division of Neuroblastoma Genomics, German Cancer Research Center (DKFZ), Heidelberg, Germany.

<sup>6</sup>These authors contributed equally: Tim van Groningen, Camilla U. Niklasson

\*Correspondence:

Johan van Nes ([w.j.vannes@amsterdamumc.nl](mailto:w.j.vannes@amsterdamumc.nl)),

Rogier Versteeg ([r.versteeg@amsterdamumc.nl](mailto:r.versteeg@amsterdamumc.nl))

Phone: +31 (0)20-5667536 (J.v.N.), +31 (0)20-5665243 (R.V.)

29 **Abstract**

30 Neuroblastoma is a pediatric tumor of the adrenergic sympathetic lineage. Most high risk  
31 neuroblastoma go in complete clinical remission by chemotherapy, which is subsequently  
32 complemented by retinoic acid (RA) maintenance therapy. However, by unresolved  
33 mechanisms most tumors ultimately relapse as therapy-resistant disease. Neuroblastoma  
34 cell lines were recently found to include, besides lineage committed adrenergic (ADRN)  
35 tumor cells, also immature mesenchymal (MES) tumor cells. Here, we report that MES-type  
36 cells synthesize RA and require this metabolite for proliferation and motility. MES cells are  
37 even resistant to RA *in vitro*. MES cells appear to resemble Schwann Cell Precursors (SCP),  
38 which are motile precursors of the adrenergic lineage. MES and SCP cells express shared  
39 RA-synthesis and RA-target genes. Endogenous RA synthesis and RA resistance thus stem  
40 from normal programs of lineage precursors that are maintained in an immature tumor cell  
41 fraction. These cells are fully malignant in orthotopic patient-derived xenograft models and  
42 may mediate development of drug-resistant relapses.

43

44

45 **Introduction**

46 The pediatric tumor neuroblastoma emerges from the peripheral sympathetic nervous  
47 lineage. Despite intensive treatment, the outcome for patients with high-stage neuroblastoma  
48 remains poor, with an overall survival rate of less than 50%<sup>1,2</sup>. Standard treatment of high-  
49 risk neuroblastoma includes several courses of induction chemotherapy, followed by surgical  
50 resection of the tumor. Patients are subsequently treated with courses of retinoic acid  
51 maintenance therapy and anti-GD2 immunotherapy to eradicate residual tumor cells<sup>3,4</sup>. Most  
52 high-stage neuroblastoma respond to these therapeutic treatments by complete clinical  
53 remission. However, the majority of them ultimately relapse as drug-resistant and lethal  
54 disease.

55 Retinoic acid (RA) induces differentiation of neuroblastoma cells *in vitro*<sup>5,6</sup>. RA has  
56 therefore been included in the treatment of neuroblastoma to promote the differentiation of

57 residual tumor cells and improve outcome. However, the clinical effects of RA on overall  
58 survival are modest<sup>4,7</sup>. It is unknown whether neuroblastoma tumors develop resistance to  
59 RA *in vivo*. *In vitro* experiments have identified several genes that can mediate RA resistance  
60 in neuroblastoma cell lines<sup>8,9</sup>.

61 We and others previously showed that neuroblastoma cell lines can be composed of  
62 phenotypically divergent cell types<sup>10,11</sup>. ADRN cells are lineage-committed and express  
63 transcription factors of the adrenergic lineage, e.g. *PHOX2A*, *PHOX2B*, *ASCL1* and *GATA3*  
64 as well as enzymes of the catecholamine biosynthesis route, like DBH, DDC and TH. MES-  
65 type neuroblastoma cells lack expression of these adrenergic markers but instead express  
66 mesenchymal marker genes e.g. *VIM*, *FN1* and *SNAI2*. MES cells express gene signatures  
67 of neural crest cells. MES and ADRN cells each have unique sets of lineage-specific super-  
68 enhancers and associated Core Regulatory Circuitries (CRCs), which are assumed to  
69 impose lineage identity<sup>12,13</sup>. Indeed, some MES-type CRC transcription factors are able to  
70 transdifferentiate ADRN cells into MES cells, including transcriptional and epigenetic  
71 reprogramming<sup>10,14</sup>. Phenotypically, MES cells are highly migratory and are *in vitro* resistant  
72 to a variety of chemotherapeutic drugs, as compared to ADRN cells. The prevalence of MES-  
73 type neuroblastoma cells *in vivo* is less clear. In two reports, no MES-type cells were  
74 identified in tumors<sup>15,16</sup>. However, a recent single cell RNAseq analysis identified MES-like  
75 primary neuroblastoma that contained tumor cells with features of several developmental cell  
76 types from the adrenergic lineage<sup>17,18</sup>. Also several pre-print reports suggest the existence of  
77 immature tumor cells in neuroblastoma tumors<sup>19-21</sup>.

78 Here, we show that undifferentiated MES-type neuroblastoma cells metabolize retinol  
79 to produce endogenous RA. These cells use RA to stimulate their proliferation and migration  
80 in a gene expression program that mimics developmental stages of the adrenergic lineage.

81

## 82 **Results**

83

### 84 **Mesenchymal neuroblastoma cells have an active RA synthesis pathway**

85 As RA is a long standing component of neuroblastoma treatment, we investigated whether it  
86 differentially affects ADRN- and MES-type cells. We studied the response to RA in four pairs  
87 of isogenic MES and ADRN neuroblastoma cell lines. Each pair has been derived from the  
88 tumor of one neuroblastoma patient and consists of >95% homogeneous MES or ADRN  
89 cells<sup>10</sup>. In each pair, RA strongly impaired the viability of ADRN-type cells, while MES-type  
90 cells were relatively resistant and continued to grow (Fig. 1a and data not shown).  
91 Consistently, treatment with RA strongly reduced the S-phase of ADRN-type cells, but MES-  
92 type cells largely preserved their S-phase (Supplementary Fig. 1a, b). MES cells are  
93 therefore *in vitro* resistant to the differentiating and anti-proliferative effects of exogenous RA.

94 A limited number of cell types can synthesize RA during early embryogenesis<sup>22,23</sup>. We  
95 investigated whether MES-type neuroblastoma cells have this property. Endogenous RA  
96 synthesis in cells starts with conversion of retinol to retinal by RDH10, followed by the  
97 generation of RA from retinal by either ALDH1A3, ALDH1A1 or ALDH3B1<sup>22,24,25</sup>  
98 (Supplementary Fig. 2a). All MES cell lines specifically expressed *ALDH1A3*, *ALDH1A1*  
99 and/or *ALDH3B1* mRNA, while ADRN cell lines hardly expressed these genes (Fig. 1b, c,  
100 Supplementary Fig. 2b and Supplementary Table 1). MES-specific expression of ALDH1A3  
101 and ALDH1A1 proteins was confirmed in three isogenic cell line pairs (Fig. 1d and  
102 Supplementary Fig. 2c). ChIP-sequencing of H3K27ac showed strong super-enhancers in  
103 the vicinity of the *ALDH1A3* and *ALDH3B1* loci, which were strictly associated with  
104 expression of these genes, indicating that they belong to the core network of genes with  
105 MES-specific super-enhancers<sup>10</sup> (Fig. 1b and Supplementary Fig. 2b-d).

106 The Aldefluor assay<sup>26</sup> showed a high ALDH enzymatic activity in the MES-type cells  
107 of the four isogenic cell line pairs, but not in the ADRN-type cells (Supplementary Fig. 3a-e).  
108 This activity was blocked by the ALDH-inhibitor DEAB (Supplementary Fig. 3a-d). We  
109 therefore studied whether MES cells can synthesize RA. RA binds to multiple RA receptors  
110 (RARs) and this complex activates Retinoic Acid Response Elements (RAREs) in gene  
111 promoters<sup>22,23</sup>. A RARE-reporter (3xRARE-luciferase) was active in the MES cell lines 691-  
112 MES and 717-MES, but not in their isogenic ADRN counterparts (Fig. 1e and Supplementary

113 Dataset 1). To test whether this RARE activity was caused by endogenous RA synthesis, we  
114 cultured the MES cells in retinol-deprived medium. This abrogated the RARE-activity, which  
115 could be rescued by addition of exogenous retinal (Fig. 1f, Supplementary Fig. 2a and  
116 Supplementary Dataset 1). Furthermore, RARE activity of MES cells was blocked by the  
117 RAR $\alpha$  inhibitor ER50891 and by the pan-RAR inhibitor BMS493 (Supplementary Figs. 2a  
118 and 4a-d). Also, inhibition of ALDH by DEAB reduced activity of the RARE-reporter, which  
119 was rescued by exogenous RA (Fig. 1g, Supplementary Fig. 2a). Consistently, silencing of  
120 ALDH1A3 impaired RA reporter activity, establishing a functional role of ALDH1A3 in the RA  
121 pathway (Supplementary Fig. 4e, f). We conclude that MES cells have an endogenous RA  
122 synthesis pathway.

123

#### 124 **Mesenchymal neuroblastoma cells require retinoic acid for proliferation and migration**

125 We investigated the functional role of endogenous RA synthesis in MES cells. Blocking of the  
126 RA synthesis route by depletion of retinol in the culture medium resulted in decreased  
127 proliferation of MES cells, but did not affect ADRN-type cells (Fig. 2a, b). MES cells detached  
128 from the culture dish and obtained a sphere-like phenotype (Supplementary Fig. 2e).  
129 Addition of retinal or RA rescued all of these effects (Fig. 2c and Supplementary Fig. 2f).  
130 Consistently, treatment of two MES and ADRN cell line pairs with DEAB inhibited  
131 proliferation of MES cells by ~50% but did not affect ADRN cells (Supplementary Fig. 2g).  
132 RA therefore spurs proliferation of MES cells.

133 We investigated the target genes of endogenous RA signaling in MES cells by mRNA  
134 profiling of retinol-deprived 691-MES and 717-MES cells treated with or without exogenous  
135 RA. This identified 62 shared RA-induced genes (logfold 1,  $p < 0.0025$ ), which were enriched  
136 for motility and cellular matrix ontologies (Fig. 2d and Supplementary Tables 2 and 3). MES  
137 cells are, in contrast to ADRN cells, highly motile<sup>10</sup> and we therefore tested whether RA  
138 supports motility of MES cells. Retinol depletion completely blocked intrinsic motility of MES  
139 cells, which was rescued by exogenous retinal or RA (Fig. 2e). The pan-RAR inhibitor  
140 BMS493 and the RAR $\alpha$  inhibitor ER50891 blocked the intrinsic motility of MES cells in a

141 dose-dependent way (Supplementary Fig. 5a). DEAB treatment of 691-MES and 717-MES  
142 inhibited expression of the RA-induced genes and reduced the intrinsic migration of these  
143 cells (Supplementary Fig. 5b, c). These data show that endogenous RA controls a gene  
144 expression program that confers a migratory phenotype to MES cell lines. Addition of  
145 exogenous RA further increased the motility of MES cells, which was blocked by each of the  
146 RAR inhibitors (Fig. 2f and Supplementary Fig. 5a). We conclude that endogenous RA  
147 signaling is required for the proliferation and migration of MES neuroblastoma cells.

148

#### 149 **RA downstream pathways differ in MES and ADRN cells**

150 The downstream pathway of RA signaling identified in MES cells does not explain why MES  
151 cells are resistant and ADRN cells are sensitive to RA. As a first analysis of this question, we  
152 analyzed the RA response pathway in ADRN-type cells. Exogenous RA did not induce  
153 motility of ADRN cells (Fig. 2f). mRNA profiling of 691-ADRN and 717-ADRN identified 98  
154 shared RA-induced genes ( $\geq$  logfold 1,  $p < 0.0025$ ). Only 10 of these genes overlapped with  
155 the RA-induced genes in MES cells (Supplementary Fig. 6a, b). The RA-target genes in  
156 ADRN cells were enriched for neuronal differentiation ontologies (Supplementary Tables 2  
157 and 4). In search for the reason why RA induced different gene sets in MES and ADRN cells,  
158 we analyzed whether these genes differ in epigenetic modifications in the different cell types.  
159 Analysis of H3K27ac and H3K4me3 ChIP-seq data did not identify clear differences of these  
160 marks around the TSSs of the RA-target genes in MES versus ADRN cells (data not shown).  
161 The mechanism by which RA activates different gene sets in MES and ADRN cells therefore  
162 needs further analyses. The gene sets induced in both cell types are consistent with the  
163 finding that RA induces differentiation in ADRN cells, but proliferation and migration in MES  
164 cells.

165

#### 166 **Heterogeneity of neuroblastoma cells reflect developmental stages of the adrenergic** 167 **lineage**

168 Neuroblastoma emerges from the peripheral adrenergic lineage<sup>27</sup>. During early  
169 embryogenesis, progenitor cells delaminate from the neural crest and migrate ventrally to  
170 form the adrenergic lineage. We therefore asked whether the RA-induced motility program of  
171 MES cells has an embryonal origin. Single-cell RNA-sequencing of the developing human  
172 adrenergic lineage recently characterized three main cell types in this lineage, i.e. Schwann  
173 Cell Precursors (SCPs), chromaffin cells and neuroblasts<sup>17,28</sup>. SCPs give rise to chromaffin  
174 cells and neuroblasts via populations of bridge cells and progenitor cell states. The clusters  
175 of early- and cycling neuroblasts were positive for the previously established ADRN tumor  
176 cell signature<sup>10</sup>, but negative for the MES tumor cell signature (Fig. 3a). In contrast, the  
177 cluster of SCP cells was strongly positive for the MES signature but negative for the ADRN  
178 signature (Fig. 3a). The SCP cells strongly expressed *ALDH1A1* and *ALDH1A3*, as well as  
179 the signature of the RA-induced genes in MES cells (Fig. 3b,c). This suggests that SCP cells  
180 are able to synthesize RA and express RA-induced motility genes, consistent with their  
181 migratory phenotype. Similarly, single-cell RNA-sequencing of the mouse adrenergic lineage  
182 identified SCPs, chromaffin cells and suprarenal ganglion cells<sup>29</sup>. The mouse suprarenal  
183 ganglion cells were positive for the ADRN signature, while SCPs were positive for the  
184 neuroblastoma MES signature, expressed *Aldh1a3* and the signature of RA-induced motility  
185 genes (Fig. 3d-f). These data suggest a conserved route of RA-synthesis and expression of  
186 RA-induced motility genes in SCP cells, consistent with their migratory phenotype. ADRN  
187 neuroblastoma cells thus resemble normal neuroblasts, while MES neuroblastoma cells  
188 mirror normal SCP cells, providing an explanation for their RA synthesis, motility and RA  
189 resistance from a developmental perspective.

190

### 191 **ALDH-positive neuroblastoma cells are malignant**

192 As MES cells are resistant to chemotherapy and RA and may escape standard  
193 neuroblastoma therapy, we analyzed the *in vivo* properties of these cells. We investigated a  
194 series of 183 stage 4 neuroblastoma<sup>30,31</sup> for activity of RA pathway genes. The human MES  
195 signature showed a gradient of expression in these tumors, in agreement with the described

196 variable proportion of MES-like neuroblastoma cells in tumors<sup>10,11,17</sup>. Human and mouse SCP  
197 signatures strongly correlated with the neuroblastoma MES signature and with the signature  
198 for RA-induced genes in MES cells ( $p = 1.15 \times 10^{-18}$  to  $6.27 \times 10^{-80}$ , Supplementary Fig. 7a,  
199 Supplementary Table 5). Expression of *ALDH1A1*, *ALDH1A3* and *ALDH3B1* strongly  
200 correlated with the neuroblastoma MES signature and the signature for RA-target genes in  
201 MES cells ( $p = 1.76 \times 10^{-9}$  to  $9.18 \times 10^{-30}$ , Supplementary Fig. 7b-d and Supplementary Table  
202 5). These analyses are in agreement with RA synthesis capacity of MES cells *in vivo*.

203 As MES cells might escape current neuroblastoma therapy, we investigated whether  
204 this cell population can initiate tumor outgrowth. Three orthotopic patient-derived xenograft  
205 (PDX) models of neuroblastoma<sup>32</sup> were serially passaged. qRT-PCR confirmed *ALDH1A3*  
206 expression in cells from all three PDX models (Supplementary Fig. 8a). Dissociation of  
207 harvested tumors revealed small subpopulations of cells with ALDH activity (Fig. 4a). Cells  
208 from PDX LU-NB-2 were FACS-sorted in ALDH<sup>pos</sup> and ALDH<sup>neg</sup> populations. After two weeks  
209 of *in vitro* culture, each population had become heterogeneous again, showing spontaneous  
210 and bidirectional transdifferentiation of both cell types *in vitro* (Fig. 4b). We transplanted  
211  $1 \times 10^4$  sorted ALDH<sup>pos</sup> or ALDH<sup>neg</sup> cells in mouse adrenal gland fat pads. After 5 months,  
212 ALDH<sup>neg</sup> cells had formed tumors in 5/5 mice and ALDH<sup>pos</sup> cells in 4/5 mice (Fig. 4c). Tumors  
213 from ALDH<sup>pos</sup> cells formed metastases in liver and lungs similar to the tumors from ALDH<sup>neg</sup>  
214 cells (Fig. 4d). Analysis of the tumors showed that they had become heterogeneous for  
215 ALDH activity (Fig. 4c). We conclude that ALDH<sup>pos</sup> cells represent a tumorigenic cell  
216 population that can recapitulate heterogeneous neuroblastoma.

217 These results may suggest that ALDH<sup>pos</sup> and ALDH<sup>neg</sup> cells in these *in vivo* models  
218 would differentially respond to RA. However, RA has been found to be a poor drug in several  
219 subcutaneous xenograft models of neuroblastoma<sup>33,34</sup>. We validated these previous  
220 observations in xenografts of neuroblastoma cell lines SH-SY5Y and KCNR. These cell lines  
221 have an ADRN phenotype *in vitro* and form predominantly ADRN-type tumors (data not  
222 shown). Daily treatment with various concentrations of RA as a single drug (2.5, 5, and 10  
223 mg RA per kg body weight per day) did not attenuate tumor growth in both models



224 (Supplementary Fig. 8b-e). Although RA can differentiate ADRN neuroblastoma cells *in vitro*,  
225 it is therefore an inefficient drug *in vivo*. It is thus unlikely that RA would promote selective  
226 outgrowth of MES-type cells during treatment of primary tumors. Clinically, RA is used in a  
227 minimal residual disease setting, following completion of chemotherapy treatment. Further  
228 research is needed to answer the question which type of neuroblastoma cells survives  
229 chemotherapy and persists during minimal residual disease and how they respond to RA  
230 maintenance therapy.

231

## 232 **Discussion**

233 In an increasing number of tumor types, individual tumors appear to include a minor fraction  
234 of immature tumor cells that lack lineage differentiation markers<sup>35-44</sup>. The immature cells can  
235 be present in treatment-naïve tumors and are often drug-resistant. This has raised the  
236 hypothesis that such cells are a source of drug-resistant tumors and relapses. Combination  
237 therapy targeting both immature tumor cells and lineage-differentiated tumor cells indeed  
238 improved survival in mouse models of several tumor types<sup>35,41,45,46</sup>. Many fundamental  
239 questions surround the immature tumor cells, like their origin and the reason of their drug  
240 resistance. Here we have addressed the question why immature tumor cells are drug-  
241 resistant. RA is used as an anti-cancer drug in several tumor types<sup>47,48</sup>. RA induces  
242 differentiation of most neuroblastoma cell lines<sup>5</sup> and clinical trials showed an improved  
243 overall survival in high risk neuroblastoma patients<sup>4</sup>. Nevertheless, the strong *in vitro* effects  
244 are thought to translate only in modestly improved clinical outcomes<sup>4,7</sup>.

245 In isogenic neuroblastoma cell line pairs, we find that RA differentiates ADRN-type  
246 cells as expected, but MES-type cells are completely resistant. MES cells even synthesize  
247 RA themselves, leading to the paradoxical situation that a subset of tumor cells synthesizes  
248 an anti-cancer drug that is intended to kill them. Abrogation of the RA synthesis in MES cells  
249 showed that MES cells critically depend on RA for motility and proliferation. RA induced  
250 different gene sets in MES cells and ADRN cells. These gene expression programs are  
251 associated with neuronal differentiation in ADRN cells, but with motility and migration in MES

252 cells. It is currently not clear why RA induces different gene sets in the two cell types. Thus  
253 far, we did not find evidence for a differential epigenetic state of these gene sets in the two  
254 cell types, but only a few epigenetic modifications were investigated (H3K27ac and  
255 H3K4me3). Apart from differential accessibility of potential RA target genes in MES and  
256 ADRN cells, also co-factors might be differentially expressed in both cell types. RA binds to  
257 RAR/RXR heterodimers which subsequently activate RARE-elements and transcription of  
258 RA-target genes<sup>22,23</sup>. RXR can also form heterodimers with other nuclear receptors<sup>49</sup>. This  
259 can lead to cross-regulation between RA, RXR and other nuclear receptor signaling  
260 pathways, depending on the dual presence of binding sites for various types of nuclear  
261 receptors in regulatory elements<sup>49</sup>. However, none of the various nuclear receptors showed a  
262 consistent differential expression in MES and ADRN cells (data not shown). A possible  
263 explanation for the observed RA-resistance can be found in various enzymes of the RA-  
264 synthesis pathway that control endogenous levels of RA signaling in cells. Co-incidentally,  
265 these enzymes of the endogenous RA-dependency pathway may degrade exogenous  
266 sources of RA and explain the resistance of MES cells to RA.

267 It is currently too early to conclude whether, when and where MES-type  
268 neuroblastoma cells exist in primary tumors *in vivo*<sup>10,11,15-21</sup>. Analysis of endogenous RA  
269 signaling in MES cells may indicate whether these cells are dependent on RA signaling *in*  
270 *vivo*. In addition, this minor population with intrinsic RA dependency and RA resistance can  
271 have potential selective advantage during consolidation therapy and may seed relapses.

272 The RA synthesis pathway also provides insight in the regulatory principles and  
273 identity of immature tumor cells. During embryogenesis, immature precursors delaminate  
274 from the neural crest and migrate ventrally to target organs where they differentiate. This  
275 suggested to us that the motile MES cells relate to migratory precursors of the adrenergic  
276 lineage. Development of the human and mouse adrenergic lineage was recently revisited by  
277 single cell RNA sequencing<sup>17,28,29</sup>. Three main cell types in the adrenergic lineage were  
278 defined at the single cell level: migratory Schwann Cell Precursors (SCP), Chromaffin cells  
279 and neuroblasts (referred to as Suprarenal Ganglion cells in mice), which are connected via

280 several intermediate cell states. Here, we found that MES cells resemble SCP cells and  
281 reiterate developmental programs from these precursor cells. SCP cells are strongly positive  
282 for the previously established signature of MES-specific genes<sup>10</sup>. In contrast, the human  
283 ADRN signature was strongly expressed by neuroblasts, which is in line with the presumed  
284 origin of neuroblastoma from immature neuroblasts<sup>17,27,28</sup>. SCP cells express the key RA  
285 synthesis genes *ALDH1A1* and *ALDH1A3* as well as the signature of RA-induced genes in  
286 MES cells. Interestingly, we note that *ALDH1A3* is specifically expressed in early SCPs,  
287 while *ALDH1A1* is expressed by early and late SCPs. These developmental differences in  
288 timing and expression may explain the patterns of *ALDH1* isoforms in various MES  
289 neuroblastoma cell lines. Together, this suggests that MES cells are not simply tumor cells  
290 that are de-differentiated and have lost lineage markers, but in fact resemble a specific  
291 precursor cell type of the adrenergic lineage. The properties and metabolism of these  
292 precursors are faithfully conserved in the MES-type tumor cells. MES and ADRN tumor cells  
293 can bi-directionally transdifferentiate into one another<sup>10</sup>. Their resemblance to SCPs and  
294 neuroblasts respectively, may represent a differentiation trajectory of the adrenergic lineage.

295 We previously established that MES cells are chemo-resistant relative to ADRN  
296 cells<sup>10</sup>. Here we show that MES cells are also resistant to RA and moreover, that this cell  
297 type can grow out to heterogeneous neuroblastoma *in vivo*. The characteristics of MES and  
298 SCP cells may lead to the identification of drugs that specifically kill MES-type  
299 neuroblastoma cells and can be used to abate the emergence of resistant tumors and  
300 relapses.

301

302 **Methods**

303

304 **Cell culture, metabolites and inhibitors**

305 Cell lines SH-SY5Y and SH-EP2 were cultured as described previously<sup>50</sup>. The isogenic cell  
306 line pairs from the tumor of patient 691 (691-MES and 691-ADRN), or from the tumor of  
307 patient 717 (717-MES and 717-ADRN) were derived and cultured in neural stem cell (NSC)  
308 medium as described<sup>10,51</sup>. Retinol-free and retinol-containing medium were prepared by  
309 addition of respectively retinol-free B27 (17504-044, Life Technologies) or retinol-containing  
310 B27 (12587-010, Life Technologies) to NSC-medium. The NBLW-MES and NBLW-ADRN  
311 cell lines were derived from the parental NBLW cell line<sup>52</sup> and will be described elsewhere  
312 (Westerhout, Hamdi et al., ms. submitted for publication.). NBLW, NBLW-MES and NBLW-  
313 ADRN cells were cultured in RPMI-1640 medium supplemented with 10% Foetal Calf Serum,  
314 1x Non-essential amino acids, 20 mM L-Glutamine, 10 units/mL penicillin and 10 µg/mL  
315 streptomycin (Life Technologies). Cell line identities were verified by short tandem repeat  
316 (STR) analysis. Cell lines were routinely checked for the presence of mycoplasma using  
317 the MycoAlert detection kit (Lonza). Neuroblastoma patient-derived xenografts (PDXs) were  
318 established and maintained as previously described<sup>32</sup>. PDX cell lines were cultured  
319 according to<sup>53</sup> and authenticated by SNP profiling (Multiplexion, Germany). All-trans retinoic  
320 acid (RA, R2625), all-trans retinal (RAL, R2500) and diethylaminobenzaldehyde (DEAB,  
321 D86256) were from Sigma. The pan-RAR inhibitor BMS493 (3509) and the RAR $\alpha$  inhibitor  
322 ER50891 (3823) were from Tocris.

323

324 **Retinoic acid reporter assay**

325 An RA reporter gene containing a multimerized Retinoic Acid Response Element  
326 (3xRARE) upstream of a firefly-luciferase gene<sup>8,9</sup> was co-transfected with a renilla-  
327 luciferase gene in MES (691-MES, 717-MES) and ADRN (691-ADRN, 717-ADRN) cells.  
328 DNA (500 ng of 3xRARE-luciferase and 500 ng of renilla luciferase) was co-transfected  
329 using FuGENE HD reagent (E2312, Promega). At 24 hours post-transfection, the culture

330 medium was replaced. Lysates for luciferase analysis were harvested at 48 hours after  
331 transfection. 100 nM RA and/or indicated concentrations of ER50891 and BMS493 were  
332 added to the culture medium 24 hours prior to the harvest of lysates for luciferase  
333 analysis. To test the effect of retinol on RA-reporter activity, 691-MES or 717-MES cells  
334 were pre-cultured for three days in the presence (+) or absence (-) of retinol prior to  
335 transfection of the 3xRARE-luciferase reporter gene. The next day, culture medium (+/-  
336 ROL) was replaced and supplemented with 100 nM RAL as indicated, followed by 24  
337 hours culture prior to luciferase analysis. Firefly- and renilla-luciferase activity was  
338 determined using the Dual-Luciferase reporter assay system (E1910, Promega) and  
339 measured on a Synergy HT microplate reader (BIOTEK). For each sample, the luciferase  
340 value was divided by the renilla value to obtain a RARE-activity measurement that is  
341 corrected for transfection efficiency. Source data of 3xRARE-luciferase experiments are  
342 provided as a Source Data file

343

#### 344 **Gene expression profiling and analysis of micro-array data**

345 Total RNA was isolated using Trizol reagent (Invitrogen) and extracted using the RNeasy  
346 Mini Kit (Qiagen) according to the manufacturer's instructions. RNA quality was verified on a  
347 Bioanalyzer (Agilent). RNA was hybridized on Affymetrix HG U133A plus2.0 gene chips and  
348 normalized using the MASS5.0 algorithm. For RNA-sequencing, libraries were generated  
349 using the Kapa RNA HyperPrep kit with RiboErase (HMR, Kapa Biosystems), according to  
350 the manufacturer's instructions. 250 ng of RNA isolated from cell lines 691-MES, 691-ADRN,  
351 717-MES, or 717-ADRN was used as an input for library preparation with 10 cycles of  
352 amplification. Libraries were sequenced on a HiSeq4000 (Illumina) with 50 base-pairs single-  
353 end reads.

354 The ADRN-RA gene expression signature was generated from the overlap of  
355 regulated genes ( $\geq$  logfold 1) in 691-ADRN and 717-ADRN cells treated with 1  $\mu$ M RA or  
356 DMSO as a control and analyzed at 0, 24, 48 or 72 hours of treatment. The MES-RA  
357 signature was generated from the overlap of RA regulated genes in 691-MES and 717-MES

358 cells that were cultured in retinol-free medium. First, cell lines were switched from retinol-  
359 containing medium to retinol-free culture medium and total RNA was harvested after  
360 culturing cells for 0, 14, 18 and 21 days in or retinol-free medium. From day 14 onwards, 1  
361  $\mu$ M RA was added to rescue gene expression in retinol-deprived cell cultures. RA target  
362 genes met the following requirements:  $\geq 1$  logfold regulated, a minimum of 1 present call,  
363 minimum expression of 50 units and  $P \leq 0.0025$  after RA treatment. Genes regulated in a  
364 DMSO control experiment were excluded. Expression data is available from GEO  
365 (GSE124960). A MES-RA gene signature score was calculated using a previously described  
366 methodology<sup>10</sup>. MES signature genes<sup>10</sup> were removed from the MES-RA signature score to  
367 exclude bias in correlation analyses of these signatures in neuroblastoma tumors.

368 Expression profiles of MES- and ADRN neuroblastoma cell line pairs are available  
369 from GEO (GSE28019 and GSE125059). The cohort of primary human neuroblastoma was  
370 described previously and is available from GEO (GSE62564<sup>31</sup>). Bioinformatic analyses were  
371 performed using the R2 platform ([r2.amc.nl](http://r2.amc.nl)). Gene ontology analysis was performed in R2  
372 using significant ( $p \leq 0.05$ ) categories in biological processes called between level 3 and 9.

373

#### 374 **Single-cell analysis of adrenergic lineage development**

375 Single-cell RNA sequencing of the human adrenergic lineage was recently published<sup>17</sup>.  
376 Processed data, as well as their UMAP embedding as used in the publication<sup>17</sup> was  
377 downloaded from ([https://adrenal.kitz-heidelberg.de/developmental\\_programs\\_NB\\_viz/](https://adrenal.kitz-heidelberg.de/developmental_programs_NB_viz/)).  
378 Data was converted into a suitable format for R2 and provided as an interactive UMAP  
379 ([r2.amc.nl](http://r2.amc.nl)). Single-cell RNA-sequencing of the mouse adrenergic lineage was published<sup>29</sup>  
380 and is available from GEO (GSE99933). For extensive descriptions of single-cell RNA  
381 sequencing methodology and filtering steps, we refer to the detailed methods sections of  
382 these studies<sup>17,29</sup>. The *t*-distributed stochastic neighbor embedding (*t*-SNE) analysis was  
383 performed in the R2 platform ([r2.amc.nl](http://r2.amc.nl)). As data, the count information from GSE99933 at  
384 NCBI GEO<sup>29</sup> was used and pre-processed such that every cell was normalized to a count,  
385 where the total sum of signal equals to 100000. Every signal was elevated by 1 unit to

386 enable log transformation. This dataset is accessible in R2 as ('Normal Peripheral Glial Cells  
387 E13.5 - Furlan - 376 - custom - gse99933'). The *t*-SNE analysis was performed in R2 on <sup>2</sup>log  
388 transformed zscore values for those genes that had a readcount signal in at least 1 cell using  
389 the Rtsne package, with perplexities ranging from 5-50. The resulting 2-dimensional  
390 coordinates from perplexity 12 were chosen for visualization and can also be found in R2 (*t*-  
391 SNE maps).

392 The mouse SCP signature was derived from a comparison of differential gene  
393 expression (ANOVA on <sup>2</sup>log transformed values, with FDR-correction), between groups of  
394 SCP cells and SRG cells. Only genes with a SCP-specific expression ( $r \geq 0.7$ ,  $n = 238$   
395 genes) were included. For analysis of this SCP signature in human neuroblastoma, human  
396 genes were translated to mouse orthologues. For correlation analysis of the SCP signature  
397 with the MES gene signature or with the RA<sup>induced</sup> gene signature, overlapping genes were  
398 removed to avoid bias in correlation.

399

#### 400 **ChIP-sequencing**

401 ChIP-sequencing was essentially performed as described<sup>10</sup>. Histone-bound DNA from  
402 isogenic cell line pairs (691-MES, 691-ADRN, 717-MES, 717-ADRN, NBLW-MES and  
403 NBLW-ADRN cells) was precipitated using antibodies against H3K27ac (ab4729, Abcam).  
404 ChIP-sequencing of H3K27ac from NBLW-MES and NBLW-ADRN cells and is available from  
405 GEO (GSE125059). ChIP-sequencing profiles of H3K27ac in 691-MES, 691-ADRN, 717-  
406 MES, 717-ADRN, SH-EP2 and SH-SY5Y cell lines were generated previously<sup>10</sup> and are  
407 available from GEO (GSE90805).

408

#### 409 **Transwell migration**

410 Transwell migration assays were performed in ThinCert 24-well transwell inserts (8  $\mu$ m  
411 pore size, 662638, Greiner).  $2.5 \times 10^5$  691-MES or 691-ADRN or  $1 \times 10^5$  717-MES or 717-  
412 ADRN cells were allowed to migrate for 48 hours through a transwell to a gradient of B27  
413 (20% B27 in the upper chamber of transwell to 100% B27 as chemoattractant in the lower

414 chamber of 24-well plate) in the presence or absence of retinol. Migration assays were  
415 performed in the presence or absence of RA, RAL, DEAB, pan-RAR inhibitor BMS493, or  
416 RAR $\alpha$  inhibitor ER50891. For retinol deprivation experiments, cells were cultured in retinol-  
417 free NSC medium for two weeks prior to seeding in a transwell. To rescue migration of  
418 retinol-deprived cell cultures, cells were pre-incubated with RAL or RA for four days prior to  
419 seeding in a transwell. Aldehyde function in cell migration was studied by pre-treatment of  
420 cells with indicated concentrations of DEAB for four days, prior to cell seeding in transwells in  
421 the presence or absence of DEAB. Non-migrated cells were removed using cotton swabs  
422 and transwells were washed in PBS. Migrated cells were fixed with 4% PFA (4078-9001,  
423 Klinipath) for 10 min., followed by fixation with 50% methanol in PBS for 5 min. and 100%  
424 methanol for 20 min. Fixed cells were stained in 0.1% crystal violet.

425

#### 426 **CyQuant proliferation assay**

427 Cells were seeded in 96-well plates and treated with indicated concentrations of RA or  
428 DEAB. After 5 or 6 days of treatment, DNA content was measured using the CyQuant assay  
429 (C35012, Life Technologies) according to the manufacturer's instructions with the exception  
430 that CyQuant reagents were added at half of the indicated volumes. DNA content was  
431 measured on a Synergy HT microplate reader (BIOTEK).

432

#### 433 **EdU incorporation assay**

434 Cells were seeded in 6 cm dishes and treated with 1, 5 and 10  $\mu$ M RA for 5 days. 691-MES  
435 and 691-ADRN cells received a 2 hour pulse with a final concentration of 10  $\mu$ M EdU, while  
436 717-MES and 717-ADRN cells were treated for 3 hours with a final concentration of 10  $\mu$ M  
437 EdU. EdU and PI staining were performed using Click-iT Plus EdU Alexa Fluor 488 Flow  
438 Cytometry Assay (C10632, Thermofischer Scientific) according to the manufacturer's  
439 instructions.

440

#### 441 **Cell count assays**



442 To determine the effect of retinol deprivation on proliferation of isogenic cell-line pairs,  
443  $5 \times 10^5$  691-MES cells,  $5 \times 10^5$  691-ADRN cells or  $4 \times 10^5$  717-MES cells were seeded in 6  
444  $\text{cm}^2$  dishes and  $4 \times 10^5$  717-ADRN cells are seeded in 25  $\text{cm}^2$  flasks in NSC medium  
445 supplemented with retinol-containing B27 or retinol-free B27. In this cell count assay, cells  
446 were counted and reseeded every week at day 3 and at day 7 for the duration of the  
447 experiment, at similar numbers as at the start of the experiment. Cell number was  
448 determined using a Coulter Counter (Beckman). To rescue the growth arrest induced by  
449 retinol deprivation, 717-MES and 691-MES were pre-cultured in retinol-free medium for 2  
450 or 3 weeks respectively to induce a proliferation phenotype before start of experiment.  
451 Subsequently,  $4 \times 10^5$  717-MES cells or  $5 \times 10^5$  691-MES cells cultured retinol-free medium  
452 were seeded in 6  $\text{cm}^2$  dishes in the absence or presence of 100 nM RA or 100 nM RAL.  
453 Total cell number was quantified using a coulter counter and cells were reseeded at  
454 similar cell densities as at start of experiment every 3<sup>rd</sup> or 4<sup>th</sup> day until the end of  
455 experiment.

456

#### 457 **Quantitative real-time PCR**

458 Total RNA was extracted using the RNeasy Mini Kit (Invitrogen). qRT-PCR for *ALDH1A1* and  
459 *ALDH1A3* was performed as described previously<sup>54</sup>. The relative gene expression was  
460 normalized to the expression of three reference genes (*SDHA*, *UBC*, *YWHAZ*) using the  
461 comparative Ct method<sup>31</sup>. Forward (F) and reverse (R) oligo sequences were ALDH1A1-F  
462 (5'-TGTTAGCTGATGCCGACTTG-3'), ALDH1A1-R 5'-TTCTTAGCCCGCTCAACACT-3') and  
463 ALDH1A3-F (5'-TCTCGACAAAGCCCTGAAGT-3', ALDH1A3-R 5'-  
464 TATTCGGCCAAAGCGTATTC-3'), SDHA-F (5'-TGGGAACAAGAGGGCATCTG-3'), SDHA-  
465 R (5'-CCACCACTGCATCAAATTCATG-3'), UBC-F (5'-ATTTGGGTCGCGGTTCTTG-3'),  
466 UBC-R (5'-TGCCTTGACATTCTCGATGGT-3'), YWHAZ-F (5'-  
467 ACTTTTGGTACATTGTGGCTTCAA-3'), YWHAZ-R 5'-CCGCCAGGACAAACCAGTAT-3').  
468 Each experimental condition was performed in triplicate.

469

470 **Western blot analysis**

471 Total cell lysates were made in RIPA-buffer supplemented with Protease inhibitor cocktail  
472 (11836170001, Roche), 1mM NaF and 1mM NaVO<sub>3</sub>. Western blotting was performed  
473 according to standard protocols. In short, protein was transferred to nitrocellulose membrane  
474 (GE healthcare, RPN203D). Membranes were blocked for 1 hour at RT, incubated at 4°C  
475 overnight with primary antibody (1:1000) and incubated for 1 hour at RT with secondary  
476 antibodies in either 2% PBA (GE healthcare, RPN418), 5% ELK or OBB (LI-COR, 829-  
477 31080) in PBS with 0.1% TWEEN (Sigma, P1379). Primary antibodies for western blotting  
478 were YAP/TAZ (8418, Cell Signaling), ALDH1A1 (54135, Cell Signaling), GATA3 (5852, Cell  
479 Signaling), total AKT (4691, Cell Signaling) and ALDH1A3 (ab129815, Abcam). Secondary  
480 antibodies for chemiluminescence detection were donkey anti-rabbit-HRP (GE healthcare,  
481 NA 9340V, 1:5000) or sheep anti-mouse-HRP (GE healthcare, NXA931, 1:5000).  
482 Chemiluminescence detection was performed using the ECL Prime Western Blotting kit (GE-  
483 healthcare, RPN2232) and developed on a ImageQuant LAS 4000 (GE healthcare, 28-9558-  
484 10). Secondary antibodies for infrared fluorescence detection were donkey anti-rabbit-  
485 IRDye® 800CW (Rockland, 611-731-127, 1:5000). For infrared fluorescent detection,  
486 membranes were scanned on an Odyssey Infrared imaging System (LI-COR, LIC-9201-00).

487

488 **Aldefluor assay**

489 ALDH enzymatic activity was determined using the ALDEFLUOR™ kit (#01700, Stem Cell  
490 Technologies). For PDX derived tumors and cell-lines, 1×10<sup>6</sup> cells and for isogenic  
491 neuroblastoma cell-line pairs, 5×10<sup>5</sup> cells were used. Cells were re-suspended in  
492 ALDEFLUOR assay buffer and ALDH substrate was added according to manufacturer's  
493 protocol. Half of the cell suspension mixture was immediately mixed with DEAB. Following  
494 incubation at 37°C, cells were suspended in ALDEFLUOR assay buffer. PDX derived cells  
495 were centrifuged and suspended in ALDEFLUOR assay buffer containing Fixable Viability  
496 Stain 660 (FVS660, 1:1000, BD Horizon) after incubation at 37°C. FACS data was acquired  
497 on either a FACSVerse instrument (BD bioscience) or Accuri C6 (BD bioscience) and

498 subsequent data analysis was performed using FlowJo software (FlowJo, LLC) or Accuri C6  
499 (BD bioscience) software.

500

### 501 **Animal procedures and immunohistochemistry**

502 Orthotopic injections of PDX cells were performed as previously described<sup>55</sup>. Four- to six-  
503 week-old female or male NSG mice were purchased from Charles River (Charles River  
504 Laboratories). Mice were housed under pathogen-free conditions. For orthotopic injections of  
505 ALDH-positive and ALDH-negative populations, cells were prepared by the ALDEFLUOR™  
506 assay (Stem Cell Technologies) and sorted on a FACSAria IIu or FACSAria III instrument  
507 using the DIVA software. Live gating was performed using DAPI as a live/dead stain. A small  
508 aliquot of sorted populations was re-analyzed directly after sorting to verify the sorting  
509 procedure. All animal procedures followed the guidelines set by the Malmö-Lund Ethical  
510 Committee for the use of laboratory animals and were conducted in accordance with  
511 European Union directive on the subject of animal rights. Experimental protocols were  
512 approved by the Malmö-Lund Ethical Committee (ethical permits M146-13 and M11-15).

513 Xenograft tumors and mice organs were fixed in formalin and embedded in paraffin.  
514 After antigen retrieval using PT Link (Dako), 4 µm tissue sections were stained and  
515 developed using AutostainerPlus (Dako). Antibodies were diluted in block solution and  
516 sections were incubated for 30 minutes with primary antibody and 20 minutes with secondary  
517 antibodies. The following antibodies were used: NCAM (Leica Biosystems, NCL-L-CD56-  
518 504, 1:50) and MYCN (Novus Biologicals, 23960002, 1:300). Images were acquired using an  
519 Olympus BX63 microscope and DP80 camera along with the CellSense Dimension imaging  
520 software.

521 For RA-treatment in neuroblastoma xenografts, SH-SY5Y or KCNR cells were  
522 implanted subcutaneously in NMRI-Foxn1<sup>nu/nu</sup> mice (Charles Rivers; females, 6-8 weeks).  
523 RA-treatment (2.5, 5, 10 mg/kg/day or vehicle control) was started at a tumor volume of 125-  
524 200 mm<sup>3</sup>. RA was administered intra-peritoneally for five consecutive days, followed by two  
525 days off treatment, for a maximum duration of three weeks. The tumor volume was

526 measured twice weekly by a caliper. Mice were sacrificed at the humane endpoint (tumor  
527 size > 1200 mm<sup>3</sup>) and the tumors were isolated, fixed in 4% (w/v) buffered formaldehyde  
528 (Klinipath) and embedded in paraffin for histological analyses. All animal experiments were  
529 conducted under institutional guidelines and according to the law, approved in DAG203AC  
530 by the AMC animal ethics committee.

531

### 532 **Statistical analysis**

533 All experimental values are reported as mean ± standard deviation from at least a group size  
534 of n=3, unless otherwise stated. A two-sided unpaired Student's *t* test was used for statistical  
535 analyses. The significance of correlations of signatures in tumor series is determined by  
536  $t=R/\sqrt{((1-r^2)/(n-2))}$ , where R is the correlation value and n is the number of samples.  
537 Distribution measure is approximately as t with n-2 degrees of freedom.

538

### 539 **Data availability**

540 ChIP-sequencing data, mRNA expression profiles and single-cell expression data used in  
541 this study are available from the Gene Expression Omnibus (GEO) with accession numbers  
542 GSE124960, GSE90805<sup>10</sup>, GSE28019<sup>10</sup>, GSE125059, GSE62564<sup>31</sup>, GSE99933<sup>29</sup>. Raw data  
543 of RARE-luciferase experiments is available for Figs. 1 and Supplementary Fig. 3 and is  
544 provided as a source data file. Reagents used in this manuscript are available from the  
545 corresponding authors upon reasonable request.

546

### 547 **References**

548

- 549 1. Maris, J.M. Recent advances in neuroblastoma. *N Engl J Med* **362**, 2202-11 (2010).
- 550 2. Matthay, K.K. *et al.* Neuroblastoma. *Nat Rev Dis Primers* **2**, 16078 (2016).
- 551 3. Yu, A.L. *et al.* Anti-GD2 antibody with GM-CSF, interleukin-2, and isotretinoin for  
552 neuroblastoma. *N Engl J Med* **363**, 1324-34 (2010).
- 553 4. Matthay, K.K. *et al.* Treatment of high-risk neuroblastoma with intensive chemotherapy,  
554 radiotherapy, autologous bone marrow transplantation, and 13-cis-retinoic acid. Children's  
555 Cancer Group. *N Engl J Med* **341**, 1165-73 (1999).
- 556 5. Sidell, N. Retinoic acid-induced growth inhibition and morphologic differentiation of human  
557 neuroblastoma cells in vitro. *J Natl Cancer Inst* **68**, 589-96 (1982).

- 558 6. Sidell, N., Altman, A., Haussler, M.R. & Seeger, R.C. Effects of retinoic acid (RA) on the growth  
559 and phenotypic expression of several human neuroblastoma cell lines. *Exp Cell Res* **148**, 21-  
560 30 (1983).
- 561 7. Peinemann, F., van Dalen, E.C., Enk, H. & Berthold, F. Retinoic acid postconsolidation therapy  
562 for high-risk neuroblastoma patients treated with autologous haematopoietic stem cell  
563 transplantation. *Cochrane Database Syst Rev* **8**, CD010685 (2017).
- 564 8. Holzel, M. *et al.* NF1 is a tumor suppressor in neuroblastoma that determines retinoic acid  
565 response and disease outcome. *Cell* **142**, 218-29 (2010).
- 566 9. Huang, S. *et al.* ZNF423 is critically required for retinoic acid-induced differentiation and is a  
567 marker of neuroblastoma outcome. *Cancer Cell* **15**, 328-40 (2009).
- 568 10. van Groningen, T. *et al.* Neuroblastoma is composed of two super-enhancer-associated  
569 differentiation states. *Nat Genet* **49**, 1261-1266 (2017).
- 570 11. Boeva, V. *et al.* Heterogeneity of neuroblastoma cell identity defined by transcriptional  
571 circuitries. *Nat Genet* **49**, 1408-1413 (2017).
- 572 12. Hnisz, D. *et al.* Super-enhancers in the control of cell identity and disease. *Cell* **155**, 934-47  
573 (2013).
- 574 13. Whyte, W.A. *et al.* Master transcription factors and mediator establish super-enhancers at  
575 key cell identity genes. *Cell* **153**, 307-19 (2013).
- 576 14. van Groningen, T. *et al.* A NOTCH feed-forward loop drives reprogramming from adrenergic  
577 to mesenchymal state in neuroblastoma. *Nat Commun* **10**, 1530 (2019).
- 578 15. Dong, R. *et al.* Single-Cell Characterization of Malignant Phenotypes and Developmental  
579 Trajectories of Adrenal Neuroblastoma. *Cancer Cell* **38**, 716-733 e6 (2020).
- 580 16. Kildisiute, G. *et al.* Tumor to normal single-cell mRNA comparisons reveal a pan-  
581 neuroblastoma cancer cell. *Sci Adv* **7**(2021).
- 582 17. Jansky, S. *et al.* Single-cell transcriptomic analyses provide insights into the developmental  
583 origins of neuroblastoma. *Nat Genet* (2021).
- 584 18. Rohrer, H. Linking human sympathoadrenal development and neuroblastoma. *Nat Genet*  
585 (2021).
- 586 19. Olsen, T.K. *et al.* Malignant Schwann cell precursors mediate intratumoral plasticity in human  
587 neuroblastoma. *bioRxiv*, 2020.05.04.077057 (2020).
- 588 20. Wolpaw, A.J. *et al.* Epigenetic state determines inflammatory sensing in neuroblastoma.  
589 *bioRxiv*, 2021.01.27.428523 (2021).
- 590 21. Yuan, X. *et al.* Single-cell RNA-sequencing of peripheral neuroblastic tumors reveals an  
591 aggressive transitional cell state at the junction of an adrenergic-mesenchymal  
592 transdifferentiation trajectory. *bioRxiv*, 2020.05.15.097469 (2020).
- 593 22. Niederreither, K. & Dolle, P. Retinoic acid in development: towards an integrated view. *Nat*  
594 *Rev Genet* **9**, 541-53 (2008).
- 595 23. Rhinn, M. & Dolle, P. Retinoic acid signalling during development. *Development* **139**, 843-58  
596 (2012).
- 597 24. Sandell, L.L. *et al.* RDH10 is essential for synthesis of embryonic retinoic acid and is required  
598 for limb, craniofacial, and organ development. *Genes Dev* **21**, 1113-24 (2007).
- 599 25. Niu, H., Hadwiger, G., Fujiwara, H. & Welch, J.S. Pathways of retinoid synthesis in mouse  
600 macrophages and bone marrow cells. *J Leukoc Biol* **99**, 797-810 (2016).
- 601 26. Ma, I. & Allan, A.L. The role of human aldehyde dehydrogenase in normal and cancer stem  
602 cells. *Stem Cell Rev* **7**, 292-306 (2011).
- 603 27. Cheung, N.K. & Dyer, M.A. Neuroblastoma: developmental biology, cancer genomics and  
604 immunotherapy. *Nat Rev Cancer* **13**, 397-411 (2013).
- 605 28. Kameneva, P. *et al.* Single-cell transcriptomics of human embryos identifies multiple  
606 sympathoblast lineages with potential implications for neuroblastoma origin. *Nat Genet*  
607 (2021).
- 608 29. Furlan, A. *et al.* Multipotent peripheral glial cells generate neuroendocrine cells of the  
609 adrenal medulla. *Science* **357**(2017).

- 610 30. Su, Z. *et al.* An investigation of biomarkers derived from legacy microarray data for their  
611 utility in the RNA-seq era. *Genome Biol* **15**, 523 (2014).
- 612 31. Zhang, W. *et al.* Comparison of RNA-seq and microarray-based models for clinical endpoint  
613 prediction. *Genome Biol* **16**, 133 (2015).
- 614 32. Braekeveldt, N. *et al.* Neuroblastoma patient-derived orthotopic xenografts retain metastatic  
615 patterns and geno- and phenotypes of patient tumours. *Int J Cancer* **136**, E252-61 (2015).
- 616 33. Di Francesco, A.M. *et al.* Enhanced cell cycle perturbation and apoptosis mediate the  
617 synergistic effects of ST1926 and ATRA in neuroblastoma preclinical models. *Invest New*  
618 *Drugs* **30**, 1319-30 (2012).
- 619 34. Zage, P.E. *et al.* A novel therapeutic combination for neuroblastoma: the vascular endothelial  
620 growth factor receptor/epidermal growth factor receptor/rearranged during transfection  
621 inhibitor vandetanib with 13-cis-retinoic acid. *Cancer* **116**, 2465-75 (2010).
- 622 35. Boshuizen, J. *et al.* Cooperative targeting of melanoma heterogeneity with an AXL antibody-  
623 drug conjugate and BRAF/MEK inhibitors. *Nat Med* **24**, 203-212 (2018).
- 624 36. Hovestadt, V. *et al.* Resolving medulloblastoma cellular architecture by single-cell genomics.  
625 *Nature* (2019).
- 626 37. Lim, J.S. *et al.* Intratumoural heterogeneity generated by Notch signalling promotes small-cell  
627 lung cancer. *Nature* **545**, 360-364 (2017).
- 628 38. Neftel, C. *et al.* An Integrative Model of Cellular States, Plasticity, and Genetics for  
629 Glioblastoma. *Cell* (2019).
- 630 39. Patel, A.P. *et al.* Single-cell RNA-seq highlights intratumoral heterogeneity in primary  
631 glioblastoma. *Science* **344**, 1396-401 (2014).
- 632 40. Pietras, A. *et al.* High levels of HIF-2alpha highlight an immature neural crest-like  
633 neuroblastoma cell cohort located in a perivascular niche. *J Pathol* **214**, 482-8 (2008).
- 634 41. Sanchez-Danes, A. *et al.* A slow-cycling LGR5 tumour population mediates basal cell  
635 carcinoma relapse after therapy. *Nature* **562**, 434-438 (2018).
- 636 42. Tamura, K. *et al.* Expansion of CD133-positive glioma cells in recurrent de novo glioblastomas  
637 after radiotherapy and chemotherapy. *J Neurosurg* **119**, 1145-55 (2013).
- 638 43. Tirosh, I. *et al.* Dissecting the multicellular ecosystem of metastatic melanoma by single-cell  
639 RNA-seq. *Science* **352**, 189-96 (2016).
- 640 44. Tirosh, I. *et al.* Single-cell RNA-seq supports a developmental hierarchy in human  
641 oligodendroglioma. *Nature* **539**, 309-313 (2016).
- 642 45. Biehs, B. *et al.* A cell identity switch allows residual BCC to survive Hedgehog pathway  
643 inhibition. *Nature* **562**, 429-433 (2018).
- 644 46. Rambow, F. *et al.* Toward Minimal Residual Disease-Directed Therapy in Melanoma. *Cell* **174**,  
645 843-855 e19 (2018).
- 646 47. Altucci, L. & Gronemeyer, H. The promise of retinoids to fight against cancer. *Nat Rev Cancer*  
647 **1**, 181-93 (2001).
- 648 48. de The, H. Differentiation therapy revisited. *Nat Rev Cancer* **18**, 117-127 (2018).
- 649 49. Evans, R.M. & Mangelsdorf, D.J. Nuclear Receptors, RXR, and the Big Bang. *Cell* **157**, 255-66  
650 (2014).
- 651 50. van Nes, J. *et al.* A NOTCH3 transcriptional module induces cell motility in neuroblastoma.  
652 *Clin Cancer Res* **19**, 3485-94 (2013).
- 653 51. Bate-Eya, L.T. *et al.* Newly-derived neuroblastoma cell lines propagated in serum-free media  
654 recapitulate the genotype and phenotype of primary neuroblastoma tumours. *Eur J Cancer*  
655 **50**, 628-37 (2014).
- 656 52. Chen, L. *et al.* Identification of different ALK mutations in a pair of neuroblastoma cell lines  
657 established at diagnosis and relapse. *Oncotarget* **7**, 87301-87311 (2016).
- 658 53. Persson, C.U. *et al.* Neuroblastoma patient-derived xenograft cells cultured in stem-cell  
659 promoting medium retain tumorigenic and metastatic capacities but differentiate in serum.  
660 *Sci Rep* **7**, 10274 (2017).

- 661 54. Mohlin, S. *et al.* PI3K-mTORC2 but not PI3K-mTORC1 regulates transcription of HIF2A/EPAS1  
662 and vascularization in neuroblastoma. *Cancer Res* **75**, 4617-28 (2015).  
663 55. Braekveldt, N. *et al.* Patient-Derived Xenograft Models Reveal Intratumor Heterogeneity  
664 and Temporal Stability in Neuroblastoma. *Cancer Res* **78**, 5958-5969 (2018).

665

666

667 **Acknowledgments**

668 We thank Sue Cohn for providing the NBLW cell line, Javanshir Esfandyari for help with  
669 mouse experiments and Richard Volckmann for processing of bio-informatics data. The  
670 RARE-reporter construct was a kind gift of René Bernards. This research was supported by  
671 grants from Villa Joep, the European Research Council (ERC-Advanced Grant no. 340735 to  
672 R.V.), KiKa (projects 11, 33, 66), Dutch Cancer Society KWF (UVA 2010-4878) and NWO  
673 (EraCoSysMed 9003035006), the Swedish Cancer Society (170276, CAN 2017/376, CAN  
674 2017/996), the Swedish Research Council (2017-01304), the Swedish Childhood Cancer  
675 Fund (PR2015-0081, PR2017/0003) and Fru Berta Kamprad's Foundation (BKS 47/2014).

676

677 **Author contributions**

678 T.v.G., R. V. and J.v.N. conceived the study, analyzed the data and wrote the manuscript.  
679 T.v.G., C.U.N., A.C., N.A., E.M.W., K.v.S., S.M., D.B., C.W. and J.v.N. performed the  
680 experiments and analyses. M.H., L.J.V., P.S., N.E.H., F.H., A.L. and P.v.S contributed to  
681 experiments. J.K. and D.A.Z. performed bio-informatics analyses. C.U.N., D.B., C.W. and  
682 S.P. designed and analyzed experiments, under the supervision of S.P. I.A., S.J and F.W.  
683 contributed single-cell expression data. R.V. and J.v.N. supervised the study.

684

685 **Declaration of interests**

686 The authors declare no competing interests.

687

688 **Additional information**

689 **Supplementary information** is available for this paper.

690 **Source Data** is available for this paper.

691 **Correspondence and requests for materials** should be addressed to J.v.N.

692



**Figure 1**

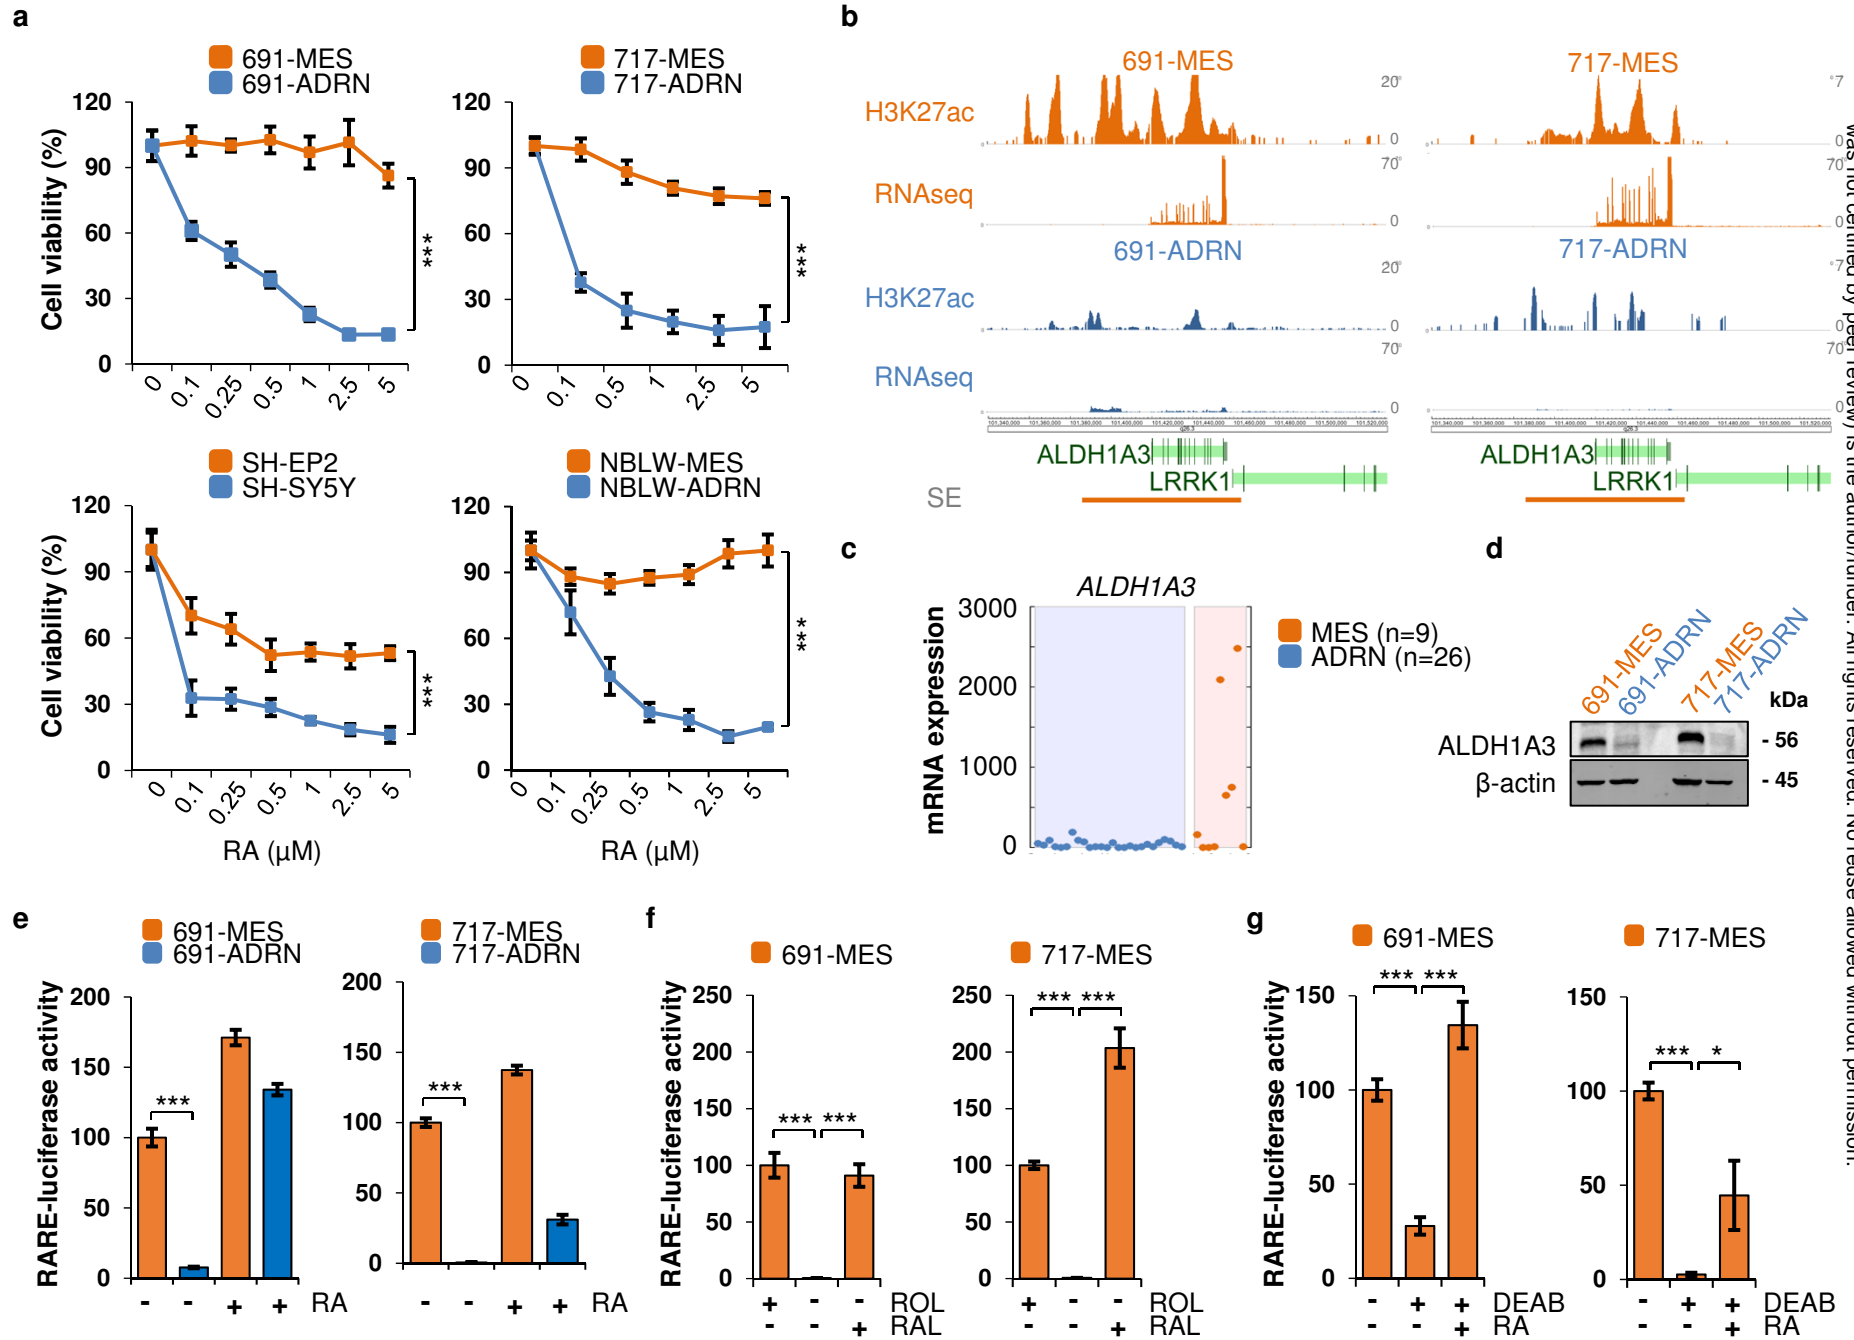

693 **Figure 1.**

694 **MES-type neuroblastoma cells are resistant to retinoic acid and have an**  
695 **endogenous retinol-to-retinoic acid synthesis pathway.**

696 A. CyQuant cell viability assay of four isogenic pairs of MES- and ADRN-type cell lines  
697 treated with increasing concentrations of Retinoic Acid (RA). Two-sided Student's *t*-test  
698 assuming equal variance was used to calculate statistical significance, \*\*\*  $p < 0.001$ . MES  
699 cells (691-MES, 717-MES, SH-EP2 and NBLW-MES) are depicted in orange, while ADRN  
700 cells (691-ADRN, 717- ADRN, SH-SY5Y and NBLW- ADRN) are depicted in blue.

701 B. H3K27ac ChIP-sequencing analysis of the genomic region around the *ALDH1A3* gene  
702 spanning positions 101,340,000-101,535,000 on chromosome 15. The y-axis shows reads  
703 per 20 million mapped sequences. Lineage-specific super-enhancers of MES cells were  
704 identified according to<sup>10</sup> and are indicated by a horizontal orange bar. RNA sequencing  
705 data is shown as reads per 20 million mapped reads and plotted on the y-axis.

706 C. Expression of *ALDH1A3* mRNA measured by Affymetrix gene expression profiling of cell  
707 lines of MES ( $n = 9$ ) or ADRN ( $n = 26$ ) phenotype.

708 D. Western blot analysis of *ALDH1A3* in 691-MES and -ADRN (left) and 717-MES and -  
709 ADRN (right) cells.  $\beta$ -actin is used as loading control.

710 E. RA reporter assay in isogenic MES- and ADRN cell line pairs derived from patients 691  
711 (left) and 717 (right). Endogenous RA reporter activity is measured in the absence (-) of  
712 exogenous RA, while an external source of RA (+) transactivates the 3xRARE-luciferase  
713 reporter.

714 F. RA reporter assay in 691-MES and 717-MES cells, cultured in the presence (+) or  
715 absence (-) of retinol (ROL) or retinal (RAL).

716 G. RA reporter assay in 691-MES and 717-MES cells incubated in the presence (+) or  
717 absence (-) of 100  $\mu$ M of the ALDH inhibitor DEAB or 100 nM RA. The normalized luciferase  
718 activities in E-G are ratios between firefly-luciferase values of the 3xRARE reporter and  
719 renilla-luciferase values of the transfection control. Error bars denote standard deviation.

720 Two-sided Student's *t*-test assuming equal variance was used to calculate statistical

721 significance, \*  $p < 0.05$ , \*\*\*  $p < 0.001$ . Source data for A, D and E-G are provided as a

722 Source Data file.

723

**Figure 2**

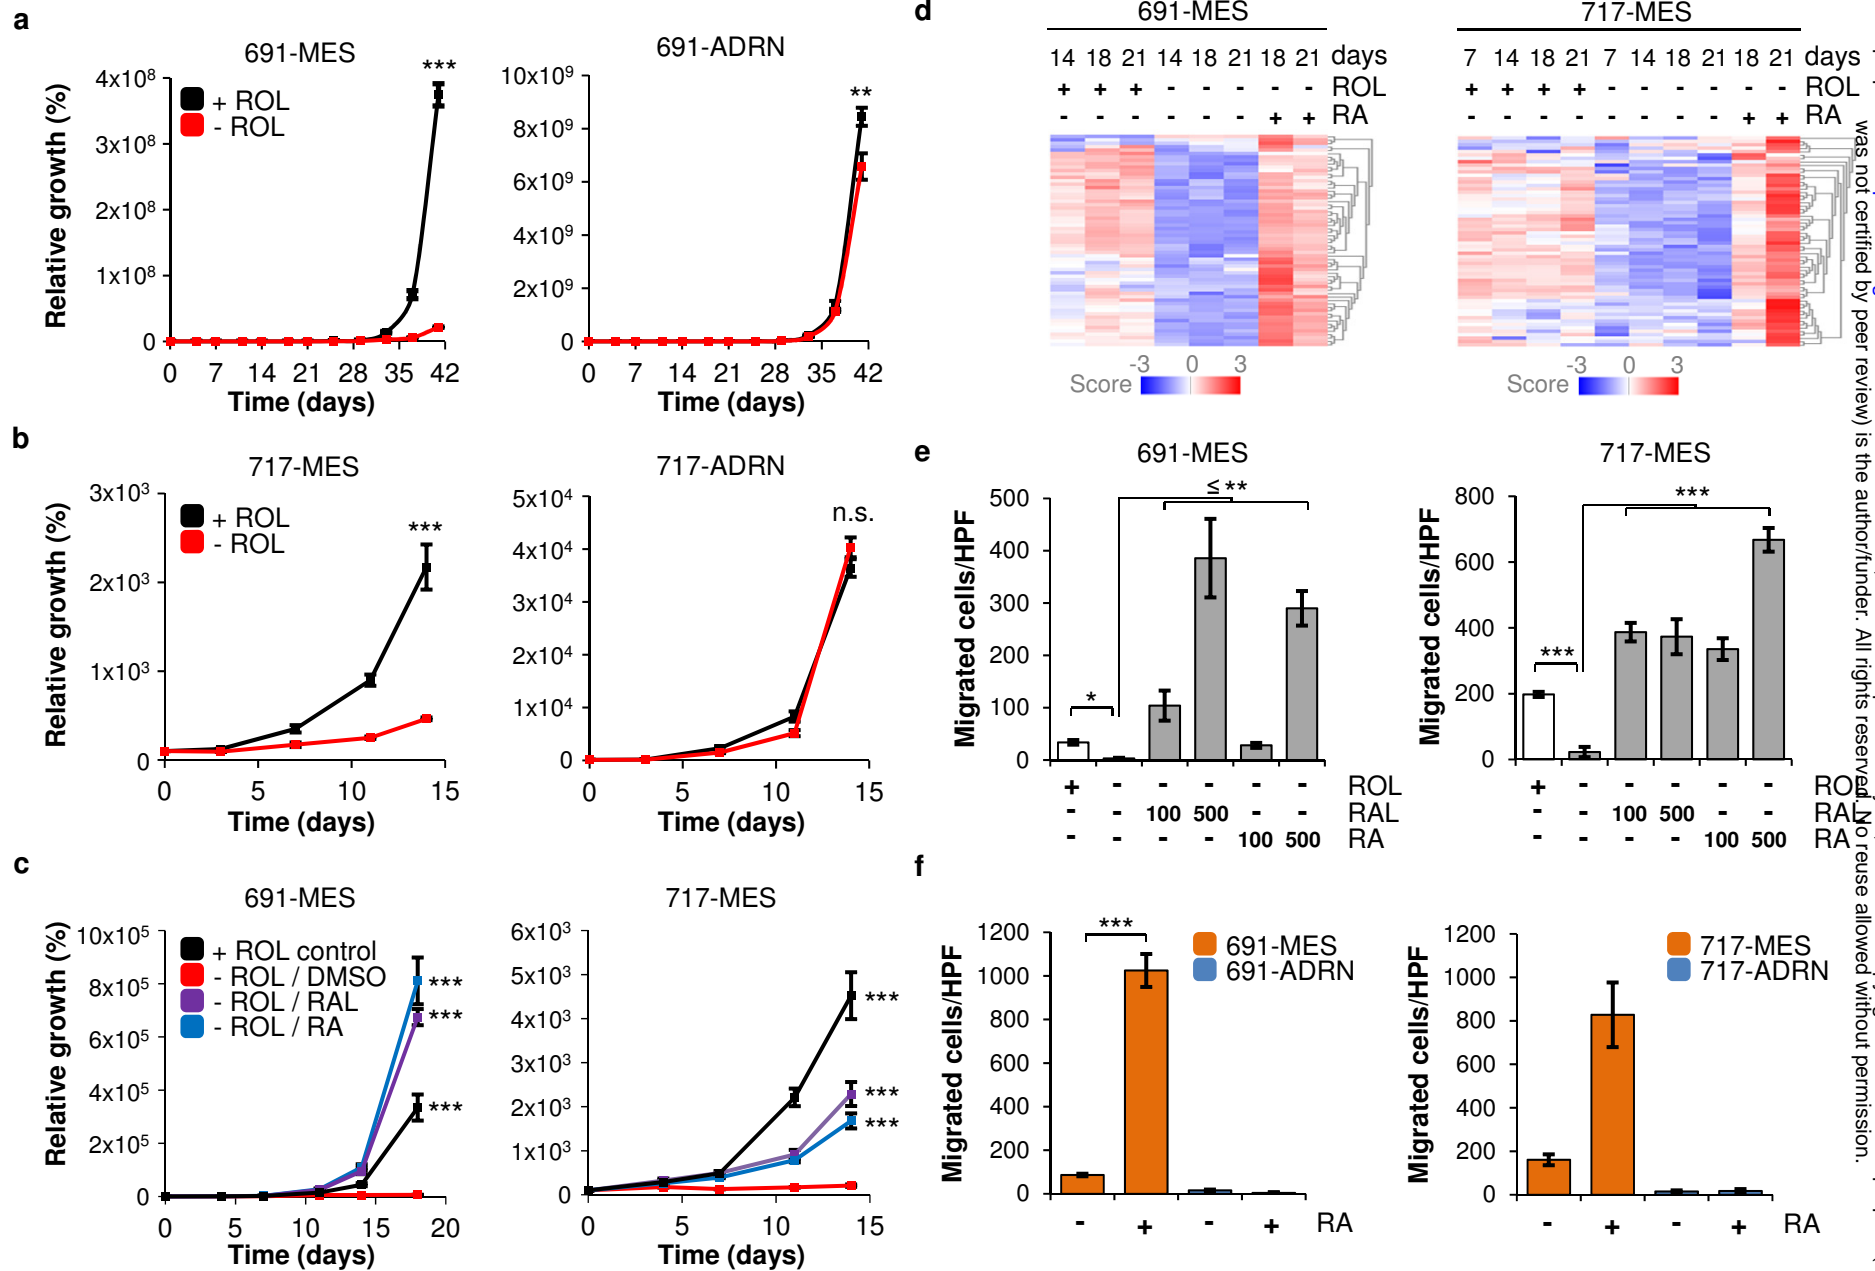

724 **Figure 2.**

725 **Retinoic acid induces proliferation and migration of MES cells.**

726 A, B. Cell count assay (see Methods for description) of (A) 691-MES (left) and 691-ADRN  
727 cells (right) and (B) 717-MES (left) and 717-ADRN cells (right) cultured in neural stem cell  
728 medium with (+ROL, black) or without retinol (-ROL, red).

729 C. Rescue of 691-MES and 717-MES cells that were cultured in the absence of retinol (-  
730 ROL). Cells were pre-cultured without retinol prior to supplementation of the medium with  
731 retinal (RAL, 100 nM), retinoic acid (RA, 100 nM) or DMSO at day 0. Proliferation of cells  
732 in the presence of retinol (+ ROL) is shown as control. Source data for A-C are provided as  
733 a Source Data File.

734 D. Z-score of mRNA expression of RA-induced target genes in MES cell lines. 691-MES and  
735 717-MES were cultured in the presence (+) or absence (-) of retinol (ROL) in a time-course  
736 mRNA analysis of three weeks. RA (1  $\mu$ M) was added from day 18 to day 21 to identify a  
737 core set of RA-induced genes in MES cells. The list of RA-target genes in MES cells is  
738 available from Supplementary Table 2.

739 E. Transwell migration assay of 691-MES and 717-MES cells in the presence (white bars)  
740 or absence (grey bars) of retinol (ROL). Cells were seeded in Boyden chambers in medium  
741 supplemented with 100 or 500 nM of retinal (RAL) or RA. Cells were allowed to migrate for  
742 48 hours. Note that 100 nM RA or RAL are sufficient to rescue migration of 691-MES and  
743 717-MES cells to the level of cell migration observed in control cells that are cultured in the  
744 presence of ROL.

745 F. Transwell migration assay of MES (orange) or ADRN (blue) cell lines of 691 or 717 in the  
746 presence (+) or absence (-) of 1  $\mu$ M RA. Cells were allowed to migrate for 48 hours. Error  
747 bars in all panels depict standard deviation. Two-sided Student's *t*-test assuming equal  
748 variance was used to calculate statistical significance, \*  $p < 0.05$ , \*\*  $p < 0.01$ , \*\*\*  $p < 0.001$ .  
749 Source data for E, F are provided as a Source Data File.

750

**Figure 3**

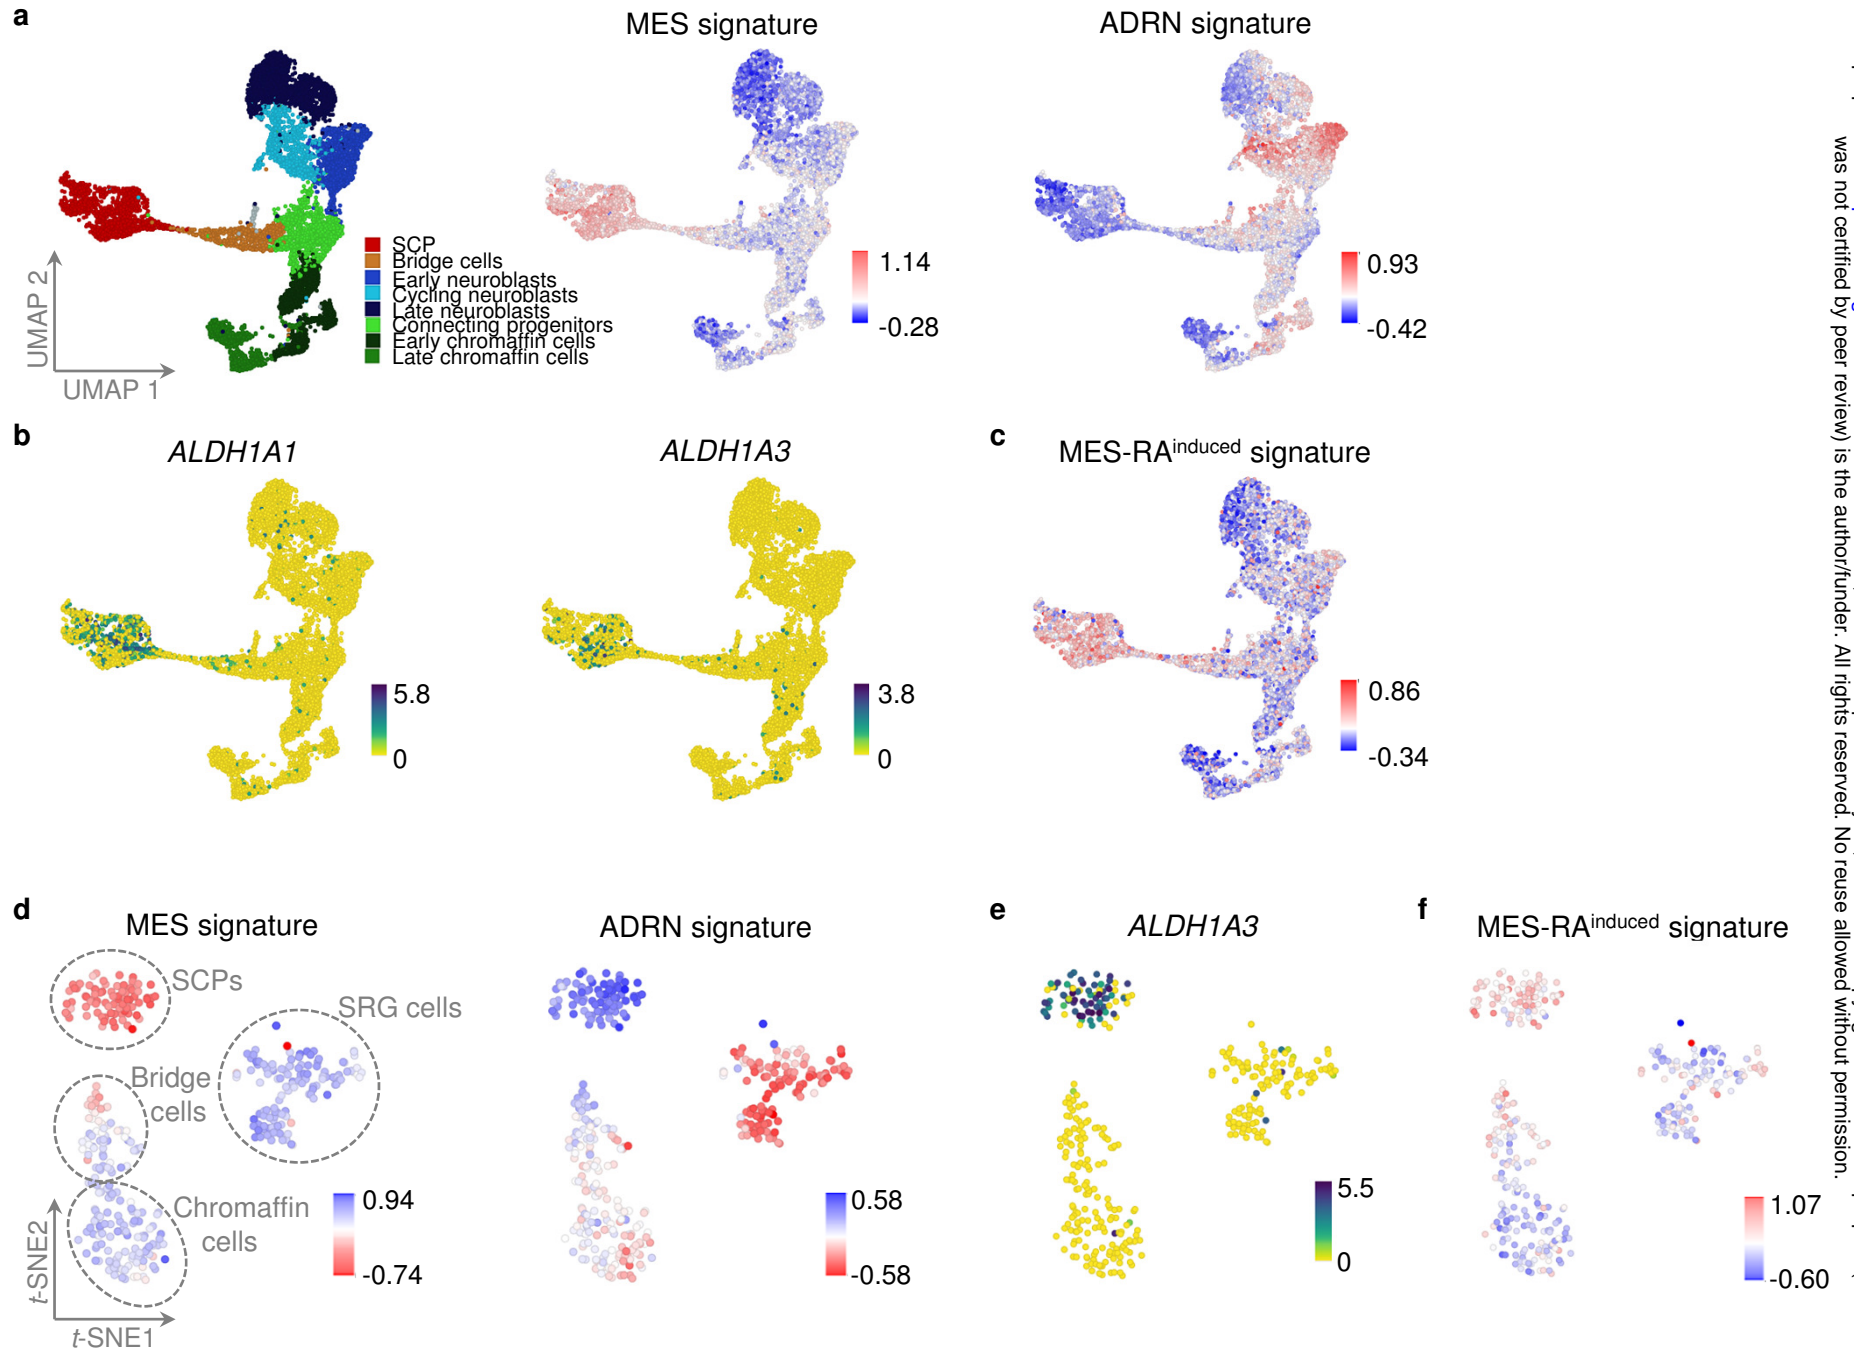

751 **Figure 3.**

752 **MES-type neuroblastoma cells resemble Schwann Cell Precursors of the developing**  
753 **adrenergic lineage.**

754 A. Visualization of gene expression signatures for MES and ADRN neuroblastoma cells<sup>10</sup> on  
755 single-cell analysis of the human adrenal lineage<sup>17</sup>. Cell types of the adrenal lineage are  
756 indicated in the left panel. MES and ADRN signatures are indicated in the middle and right  
757 panels. The scale indicates the summed z-score of genes from each signature.

758 B. Expression of *ALDH1A1* and *ALDH1A3* mRNA in cell types of the human adrenergic  
759 lineage. Color scale shows <sup>2</sup>log-transformed expression.

760 C. Expression of the MES-specific RA-target gene signature in the human adrenergic  
761 lineage. The signature scale shows the summed z-scores of expressed genes of the  
762 signature in each cell.

763 D. Gene expression signatures of MES and ADRN neuroblastoma cells<sup>10</sup> visualized on *t*-SNE  
764 analysis of single-cell RNA sequencing analyses of the developing murine adrenergic  
765 lineage<sup>29</sup>. The scale indicates the summed z-score of genes from each signature. Schwann  
766 Cell Precursors (SCPs), bridge cells, Chromaffin cells and Suprarenal Ganglion (SRG) cells  
767 are indicated. Perplexity 12 is chosen for visualization of the *t*-SNE map.

768 E. Expression of *Aldh1a3* mRNA in the murine adrenergic lineage. Color scale shows <sup>2</sup>log-  
769 transformed expression.

770 F. Expression of the MES-specific RA-target gene signature, visualized on single-cells of the  
771 developing murine adrenergic lineage. The signature scale shows the summed z-scores of  
772 expressed genes of the signature in each cell.

773

**Figure 4**

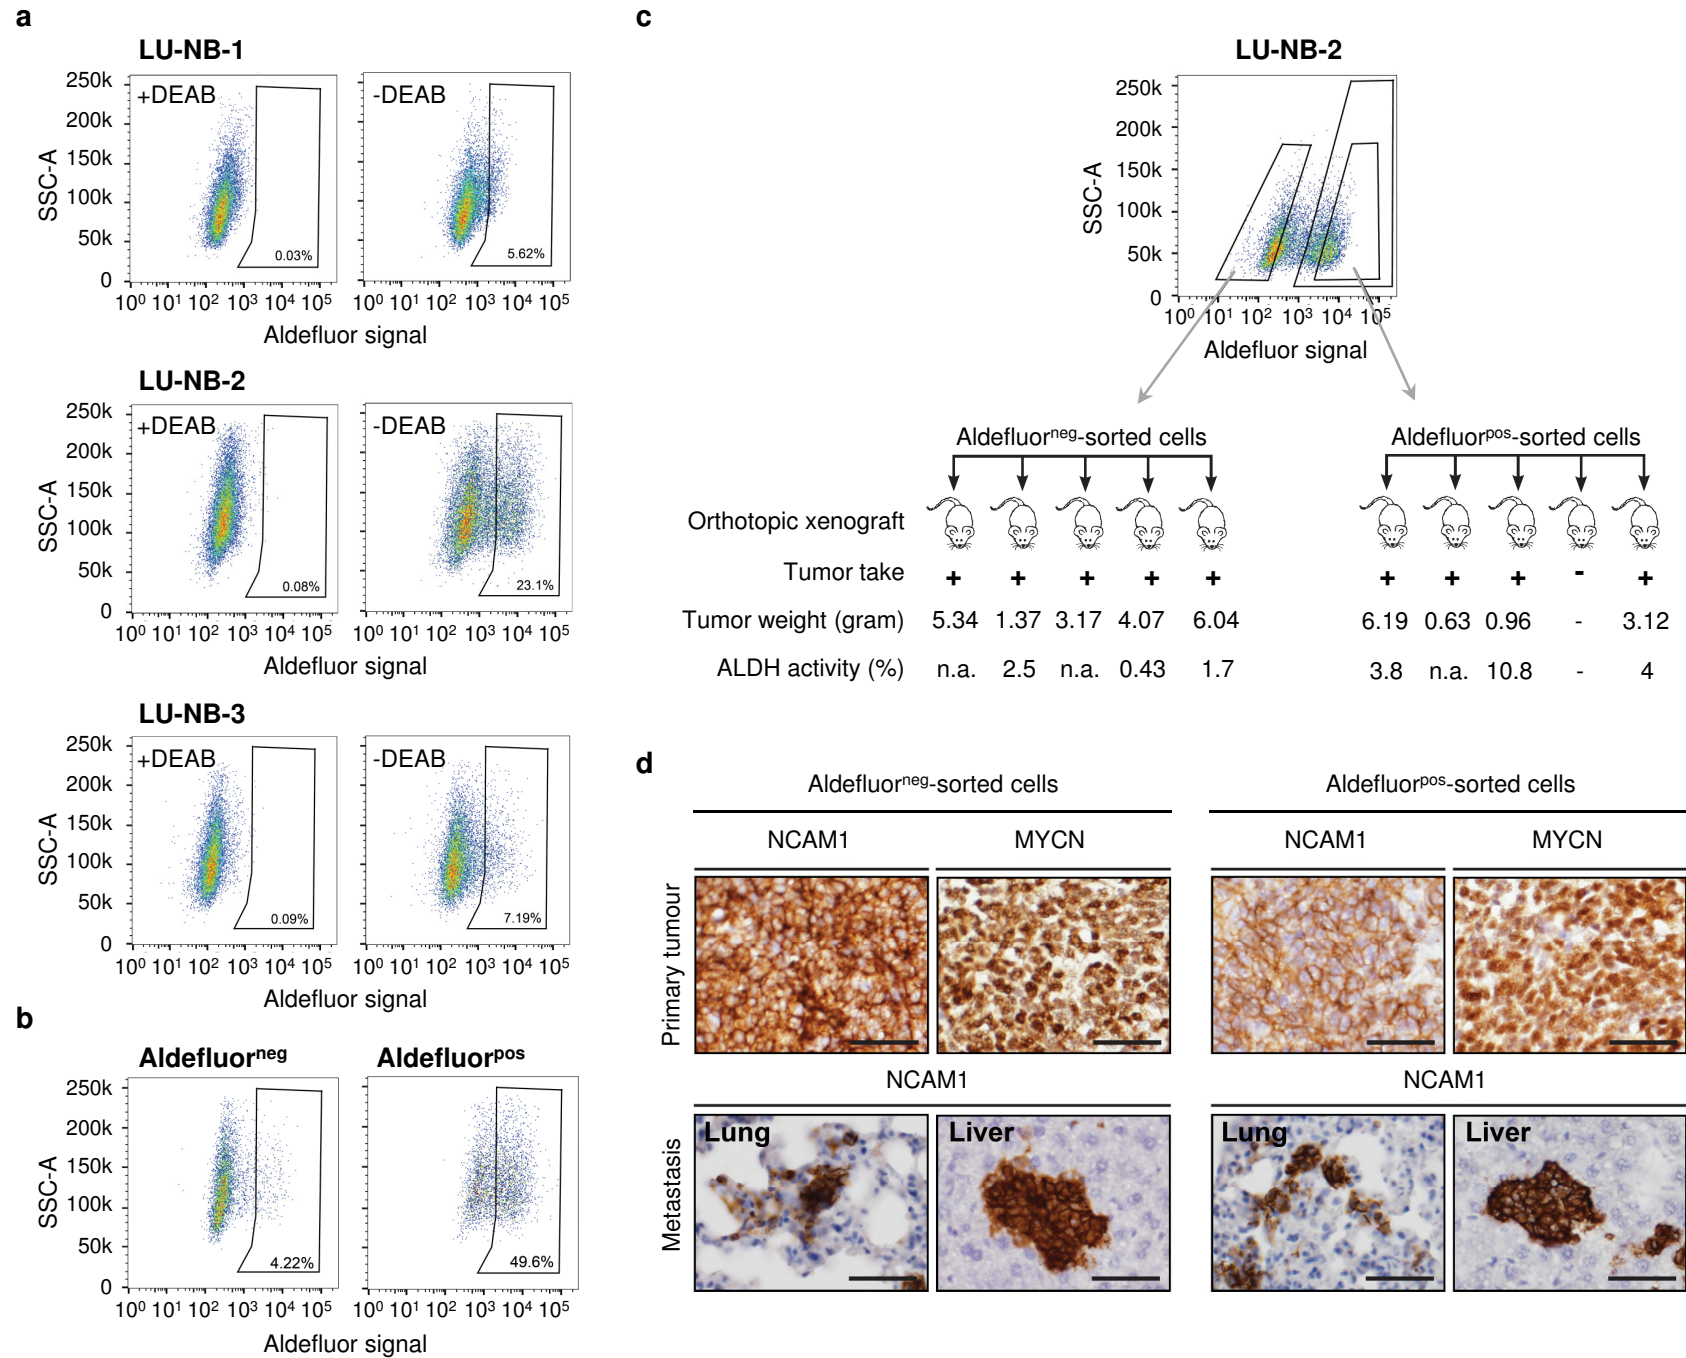



774 **Figure 4.**

775 **ALDH<sup>positive</sup> neuroblastoma cells are oncogenic in an orthotopic PDX model and form**  
776 **ALDH<sup>positive</sup> and ALDH<sup>negative</sup> heterogeneous tumors.**

777 A. Flow cytometry analysis of ALDH activity in cells from the tumors of three orthotopic  
778 neuroblastoma PDX tumors (LU-NB-1, LU-NB-2 and LU-NB-3). The corresponding DEAB  
779 controls for each sample are shown in the left panels, while the gate marks Aldefluor<sup>positive</sup>  
780 cells in the right panels. Aldefluor-activity and side-scatter (SSC) are shown on the x-axis  
781 and y-axis, respectively.

782 B. Interconversion analysis of Aldefluor<sup>positive</sup> and Aldefluor<sup>negative</sup> cells. Cells from PDX LU-  
783 NB-2 were harvested and sorted in Aldefluor<sup>positive</sup> and Aldefluor<sup>negative</sup> cells that were  
784 subsequently cultured *in vitro* for T=14 days and re-analysed by FACS for ALDH-activity. The  
785 gate indicates ALDH<sup>positive</sup> cells. Note that Aldefluor<sup>positive</sup> cells generate Aldefluor<sup>negative</sup> cells  
786 and *vice versa*. Aldefluor-activity is shown on the x-axis, side-scatter (SSC) is shown on the  
787 y-axis.

788 C. Aldefluor<sup>positive</sup> and Aldefluor<sup>negative</sup> cells were sorted from LU-NB-2 cells and  $1 \times 10^4$  cells  
789 were orthotopically injected into immunocompromised mice ( $n = 5$  per group). At sacrifice,  
790 tumor take and tumor weight (in grams) were determined. Cells were isolated from three  
791 tumors of each mouse group and analysed for ALDH activity by Aldefluor assay. The  
792 percentage of Aldefluor<sup>positive</sup> cells is indicated.

793 D. Primary tumors as well as the lungs and liver were isolated from all tumor-bearing mice.  
794 Stained for NCAM1 and/or MYCN expression revealed metastatic growth in the lungs and  
795 livers. Scale bar, 50  $\mu\text{m}$ .
